# Supplementary material for: Influence of multi-cycle loading on the structure and mechanics of marine mussel plaques
Source: Royal Society of Chemistry journal article supplement (doi:10.1039/c7sm01299c), 2017-01-01
Supplement: c7sm01299c1.pdf [file c7sm01299c1.pdf]

## Influence of multi-cycle loading on the structure and mechanics of marine mussel plaques

Menaka H. Wilhelm, Emmanouela Filippidi, J. Herbert Waite, and Megan T. Valentine

### Supplementary Data

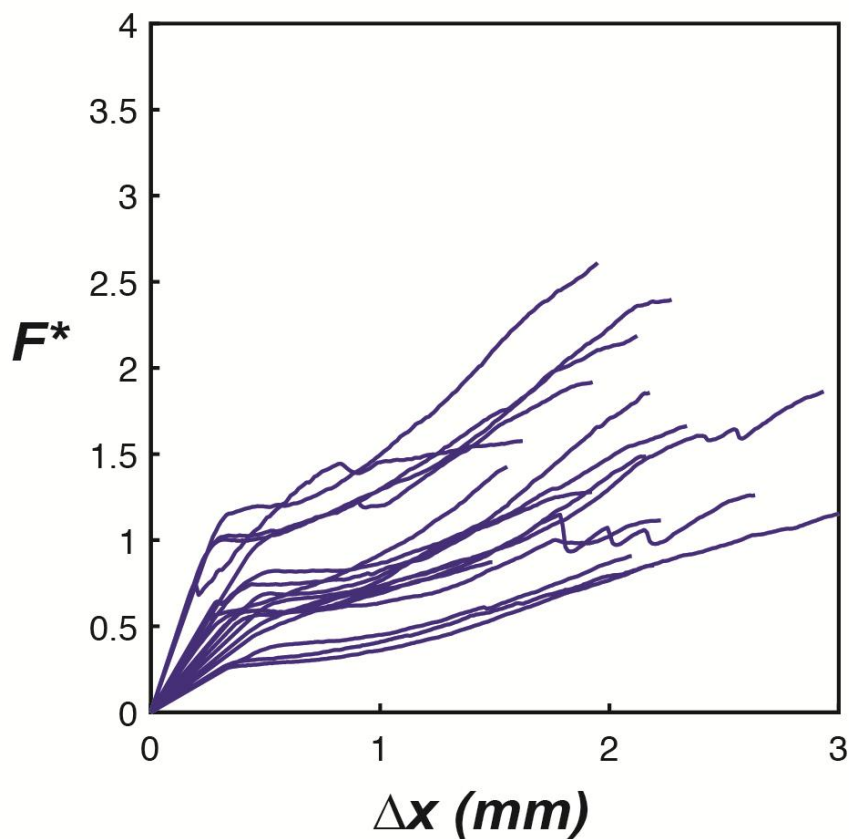

**Figure S1: Force required to extend the plaque-thread sample under monotonic loading.** The force,  $F(\Delta x)$ , of each individual plaque-thread loading has been scaled by the geometric mean of the plaque's diameters,  $D_p$ , to produce the scaled quantity  $F^*(\Delta x)$ .

| <b>Adhesive Failures</b> |                   |                                 |                                |
|--------------------------|-------------------|---------------------------------|--------------------------------|
|                          | Number of Samples | Average of $F^*_{MAX}/F^*_{PL}$ | StdDev of $F^*_{max}/F^*_{PL}$ |
| Monotonic Loading        | 6                 | 2.304                           | 0.424                          |
| Scheme #1                | 2                 | 2.528                           | 0.016                          |
| Scheme#2                 | 3                 | 3.467                           | 1.206                          |
| Scheme#3                 | 1                 | 2.613                           |                                |
| Scheme #4                | 2                 | 3.829                           | 1.250                          |
| Total                    | 14                | 2.825                           | 0.898                          |

| <b>Cohesive Failures</b> |                   |                                 |                                |
|--------------------------|-------------------|---------------------------------|--------------------------------|
|                          | Number of Samples | Average of $F^*_{MAX}/F^*_{PL}$ | StdDev of $F^*_{max}/F^*_{PL}$ |
| Monotonic Loading        | 1                 | 2.547                           | -                              |
| Scheme #1                | 1                 | 0.837                           | -                              |
| Scheme#2                 | 1                 | 3.734                           | -                              |
| Scheme#3                 | 1                 | 4.034                           | -                              |
| Scheme #4                | 0                 | -                               | -                              |
| Total                    | 4                 | 2.788                           | 1.451                          |

| <b>Thread Failures</b> |                   |                                 |                                |
|------------------------|-------------------|---------------------------------|--------------------------------|
|                        | Number of Samples | Average of $F^*_{MAX}/F^*_{PL}$ | StdDev of $F^*_{max}/F^*_{PL}$ |
| Monotonic Loading      | 11                | 3.236                           | 1.263                          |
| Scheme #1              | 3                 | 1.970                           | 2.003                          |
| Scheme#2               | 2                 | 2.509                           | 0.432                          |
| Scheme#3               | 4                 | 3.048                           | 0.890                          |
| Scheme #4              | 4                 | 3.046                           | 0.598                          |
| Total                  | 24                | 2.954                           | 1.177                          |

**Tables S1: Maximum scaled force,  $F^*_{MAX}$ , normalized by the proportional limit of the scaled force,  $F^*_{PL}$ .** Three failure modes are shown: adhesive failures due to delamination between plaque and glass, cohesive failures within plaque bulk, and thread failures. StdDev is standard deviation. The various loading schemes are described in Table 2.
